# Supplementary material for: IL-6 secretion in osteoarthritis patients is mediated by chondrocyte-synovial fibroblast cross-talk and is enhanced by obesity
Source: PubMed Central journal article supplement (PMC5471184; doi:10.1038/s41598-017-03759-w), 2017-06-14
Supplement: 41598_2017_3759_MOESM1_ESM.pdf [file 41598_2017_3759_MOESM1_ESM.pdf]

**IL-6 secretion in osteoarthritis patients is mediated by chondrocyte-synovial fibroblast cross-talk and is enhanced by obesity**

Mark J Pearson, Dietmar Herndler-Brandstetter, Mohammad A Tariq, Thomas A Nicholson, Ashleigh M Philp, Hannah L Smith, Edward T Davis, Simon W Jones and Janet M Lord

**Supplementary Table S1: Cytokine expression in OA synovial fluid**

| Cytokine     | Abundance (pg/ml) |                           | p value |
|--------------|-------------------|---------------------------|---------|
|              | <i>-leptin</i>    | <i>+leptin (500ng/ml)</i> |         |
| IL4          | 0.41 ± 0.19       | 0.5 ± 0.25                | 0.7860  |
| IL6          | 339.31 ± 6.18     | 691.19 ± 36.66            | 0.0007  |
| IL8          | 566.03 ± 487.67   | 876.9 ± 755.5             | 0.7470  |
| IL10         | 3.16 ± 0.49       | 3.08 ± 0.88               | 0.9407  |
| IL17         | 21.01 ± 7.52      | 27.75 ± 13.53             | 0.6856  |
| GM-CSF       | 55.53 ± 4.07      | 59.83 ± 3.68              | 0.4769  |
| TNF $\alpha$ | 15.26 ± 3.76      | 18.37 ± 5.69              | 0.6727  |

Statistical significance was determined by unpaired T test.

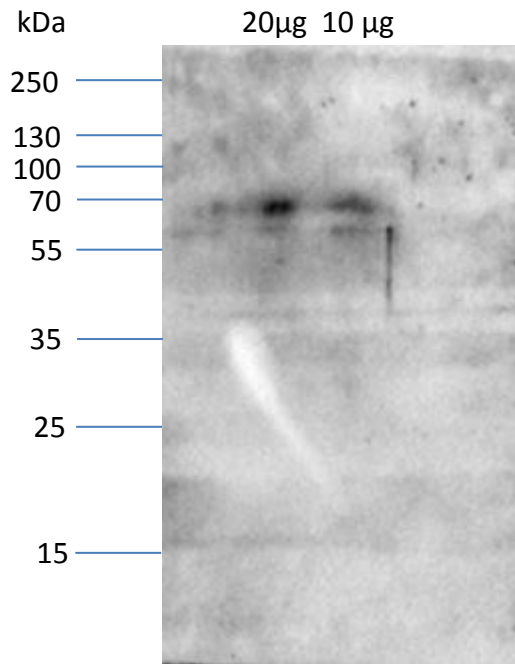

**Supplementary Figure 1.** Western blot demonstrating positive CD55 expression in primary OA synovial fibroblasts. Total protein RIPA lysates (20 and 10  $\mu$ g) were subjected to 10% SDS-PAGE, and immunoprobed with a CD55 antibody (Abcam, ab133684). Blots were developed using ECL. Molecular weight marker used was PageRuler Plus (ThermoFisher).

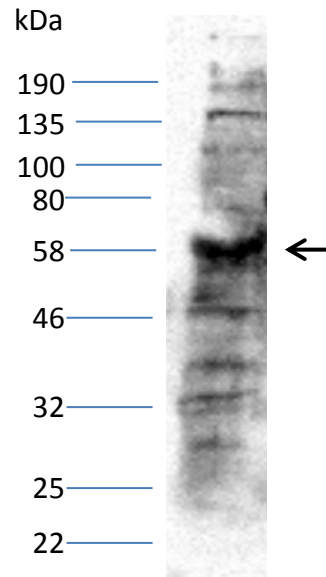

**Supplementary Figure 2.** Western blot demonstrating positive expression of Type II collagen in primary human OA chondrocytes isolated by collagenase digestion of articular cartilage. Total protein RIPA lysates (10  $\mu$ g) were subjected to 10% SDS-PAGE, and immunoprobed with a Col2 antibody (Abcam, ab34712). Blots were developed using ECL. Molecular weight marker used was Colour Prestained Protein Standard, Broad-range (NEB).

Chondrocytes

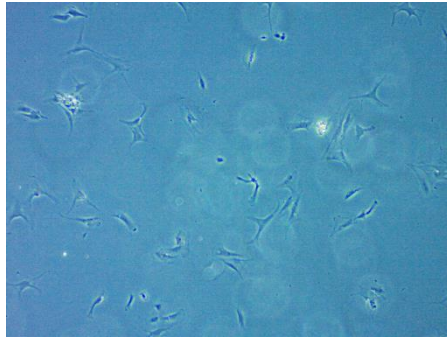

Control

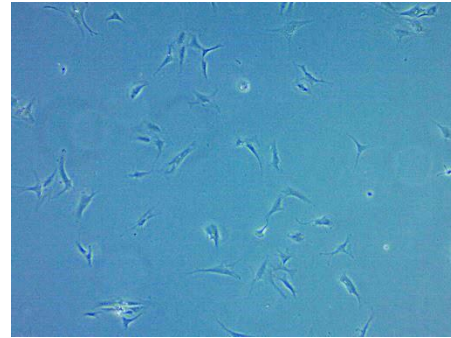

Leptin (500 ng/ml)

HRas  
Fibroblasts

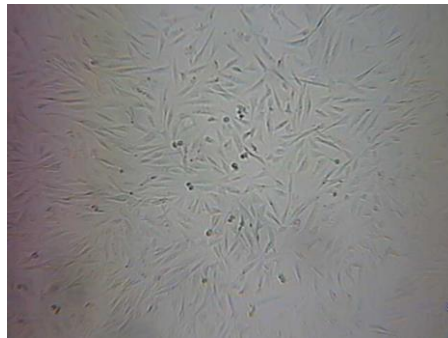

Control

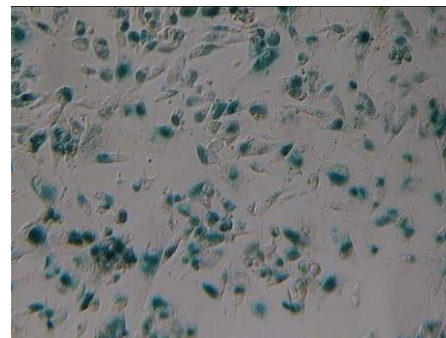

4-OHT (333 nM)

**Supplementary Figure 3. *In situ* staining for Beta-gal activity as a marker of cellular senescence.** Primary human OA chondrocytes cultured in T25 culture flasks were stimulated for 24h with leptin (500 ng/ml), or left unstimulated. Beta-gal staining was performed using a histochemical staining kit (Sigma Aldrich, UK). A HRas fibroblast cell line was used as a positive control, whereby senescence was induced by addition of 4-OHT. Images are at 4x magnification
